# Supplementary material
Source: PubMed Central journal article supplement (PMC3193074)
Supplement: NIHMS327442-supplement-supplement_1.pdf [file NIHMS327442-supplement-supplement_1.pdf]

**sFig. 1**

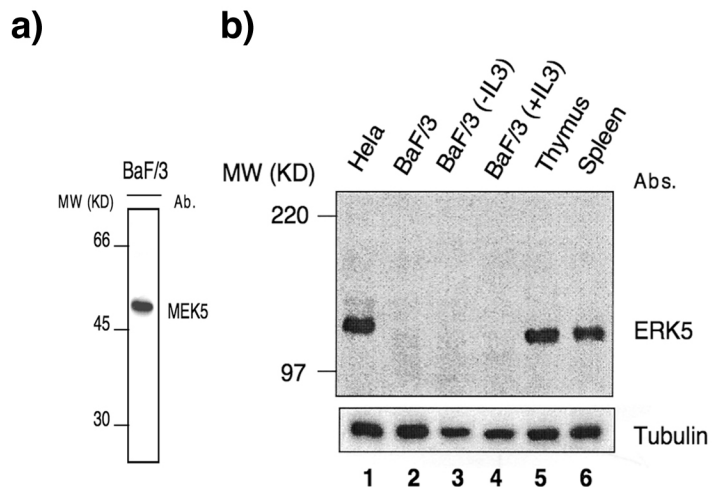

**sFig. 2**

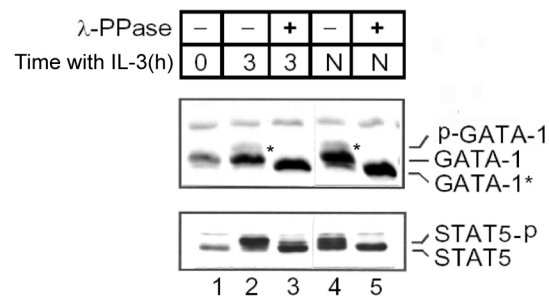

**sFig. 3**

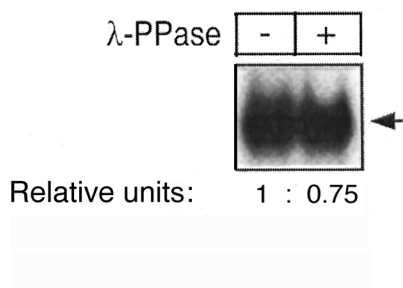

**sFig. 4**

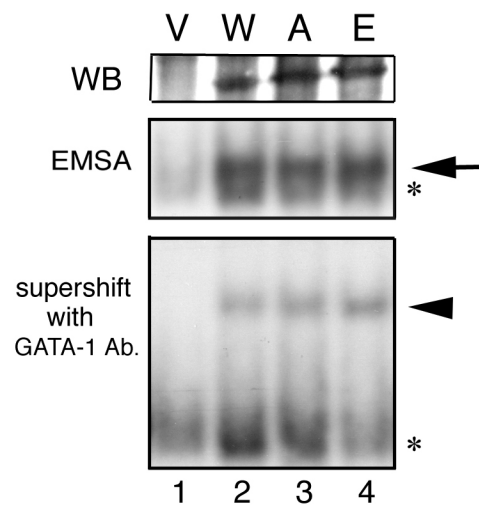

**sTable 1**

| ANTIBODY      | COATED ANTIGEN           | ANTIBODY TITER * |
|---------------|--------------------------|------------------|
| Anti-P-GATA-1 | GATA-1 (p-peptide)       | > 5,000,000      |
|               | GATA-1 (control peptide) | < 200            |

\* Antibody titer means the dilution fold of antibody solutions that produced an OD of 1.0 in the ELISA assay.
